# Supplementary material
Source: publisher site journal article supplement (https://www.dovepress.com/article/344679)
Supplement: Supplementary file 1 [file get_supplementary_file.php]

Biodegradable Materials with Disulfide-Bridged-Framework Confine Photosensitizers for Enhanced Photo-Immunotherapy

Dongbei Li1, Fangman Chen3, Cheng Cheng1, Haijun Li2, * and Xudong Wei1, *

1Department of Hematology, Affiliated Tumor Hospital of Zhengzhou University, Henan Cancer Hospital, 127 Dongming Road, Zhengzhou City, Henan Province, China;

2Department of Clinical Laboratory, The First Affiliated Hospital of Zhengzhou University, Zhengzhou, Henan 450052, China;

3School of Biomedical Engineering (Suzhou), Division of Life Sciences and Medicine, University of Science and Technology of China, 96 Jinzhai Road, Hefei 230026, China

*These authors contributed equally to this work.

Correspondence:

Xudong Wei,

Department of Hematology, Affiliated Tumor Hospital of Zhengzhou University, Henan Cancer Hospital, 127 Dongming Road, Zhengzhou City, Henan Province, China.

E-mail addresses: xudongwei@zzu.edu.cn.

Haijun Li,

Department of Clinical Laboratory, The First Affiliated Hospital of Zhengzhou University, Zhengzhou, Henan 450052, China.

E-mail: navylizz@sina.com


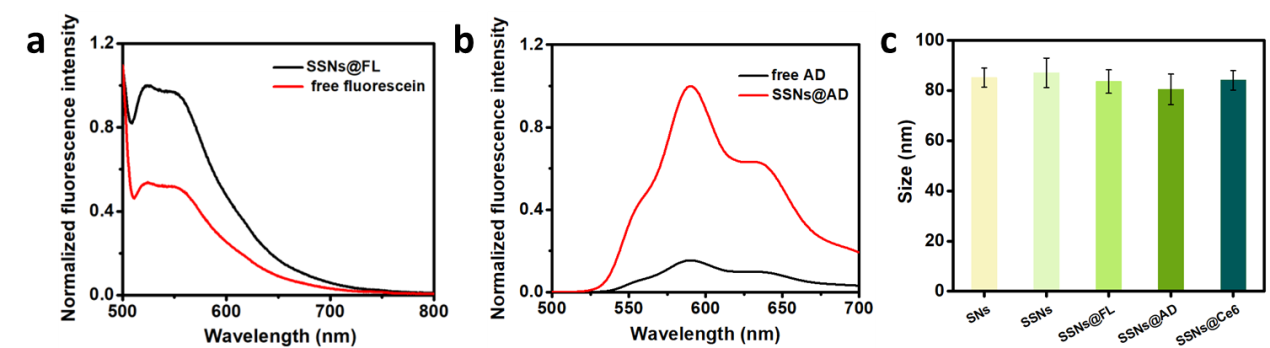


**Figure S1.** Figure S1. Notes: (a) Emission spectra of FL and SSNs@FL. (b) Emission spectra of AD and SSNs@AD. (c) Size of SNs, SSNs, SSNs@FL, SSNs@AD, and SSNs@Ce6.

Abbreviations: FL, fluorescein; SSNs@FL, fluorescein-loading disulfide-bond-bridged organosilica nanoparticles; AD, adriamycin; SSNs@AD, adriamycin-loading disulfide-bond-bridged organosilica nanoparticles; SNs, inorganic silica nanocarrier; SSNs, disulfide-bond-bridged organosilica nanoparticles; SSNs@FL, fluorescein-loading disulfide-bond-bridged organosilica nanoparticles; SSNs@AD, adriamycin-loading disulfide-bond-bridged organosilica nanoparticles; SSNs@Ce6, chlorin e6-loading disulfide-bond-bridged organosilica nanoparticles.


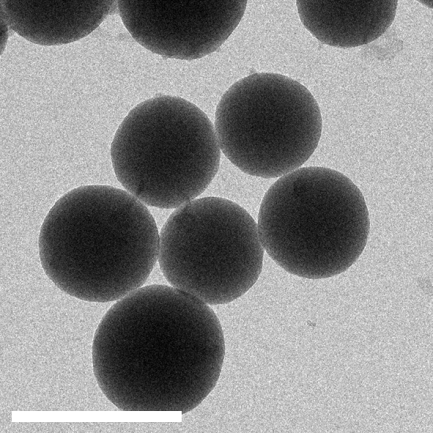


**Figure S2.** TEM image of SNs.

**Abbreviations:** SNs, inorganic silica nanocarrier.


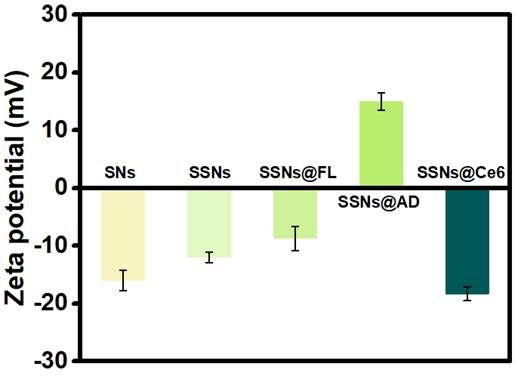


**Figure S3.** Zeta potential of SNs, SSNs, SSNs@FL, SSNs@AD, and SSNs@Ce6.

**Abbreviations:** SNs, inorganic silica nanocarrier; SSNs, disulfide-bond-bridged organosilica nanoparticles; SSNs@FL, fluorescein-loading disulfide-bond-bridged organosilica nanoparticles; SSNs@AD, adriamycin-loading disulfide-bond-bridged organosilica nanoparticles; SSNs@Ce6, chlorin e6-loading disulfide-bond-bridged organosilica nanoparticles.


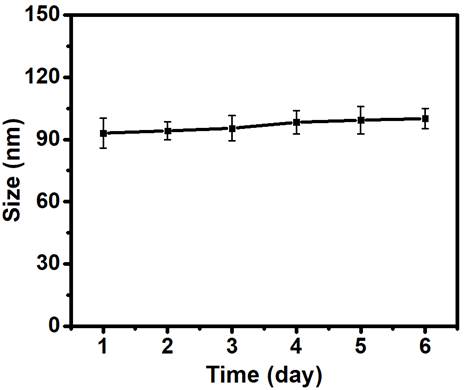


**Figure S4.** Colloidal stability of SSNs@Ce6 in DMEM plus 50% FBS for 7 days.

**Abbreviations:** SSNs@Ce6, chlorin e6-loading disulfide-bond-bridged organosilica nanoparticles; DMEM, dulbecco’s modified eagle medium; FBS, fetal bovine serum.


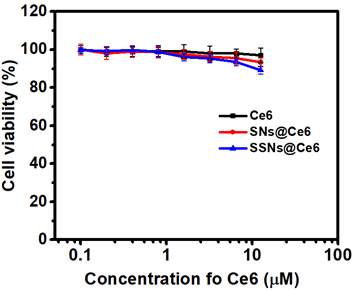


**Figure S5.** Cytotoxicity of free Ce6, SNs@Ce6, and SSNs@Ce6 against 4T1 in dark.

**Abbreviations:** SNs, inorganic silica nanocarrier; SNs@Ce6, chlorin e6-loading inorganic silica nanocarrier; SSNs@Ce6, chlorin e6-loading disulfide-bond-bridged organosilica nanoparticles.


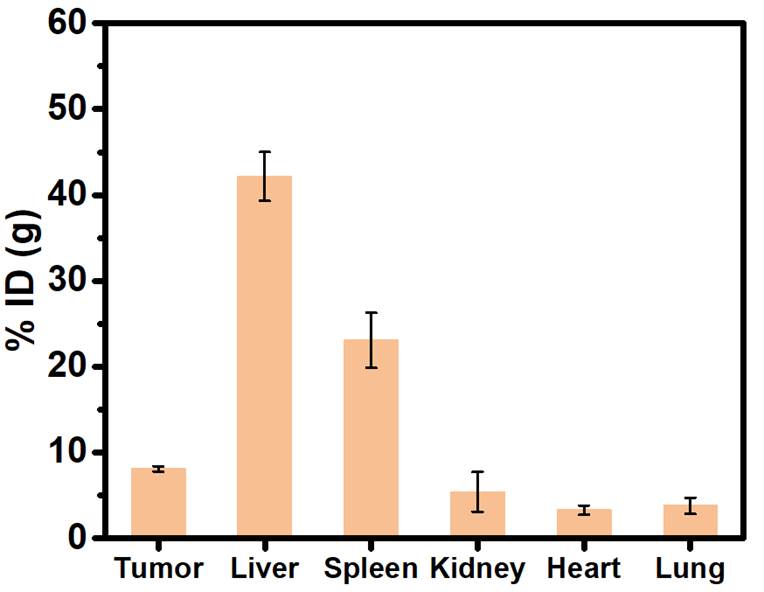


**Figure S6.** Biodistribution of SSNs@Ce6 in 4T1-tumor-bearing mice.

**Abbreviations:** SSNs@Ce6, chlorin e6-loading disulfide-bond-bridged organosilica nanoparticles.


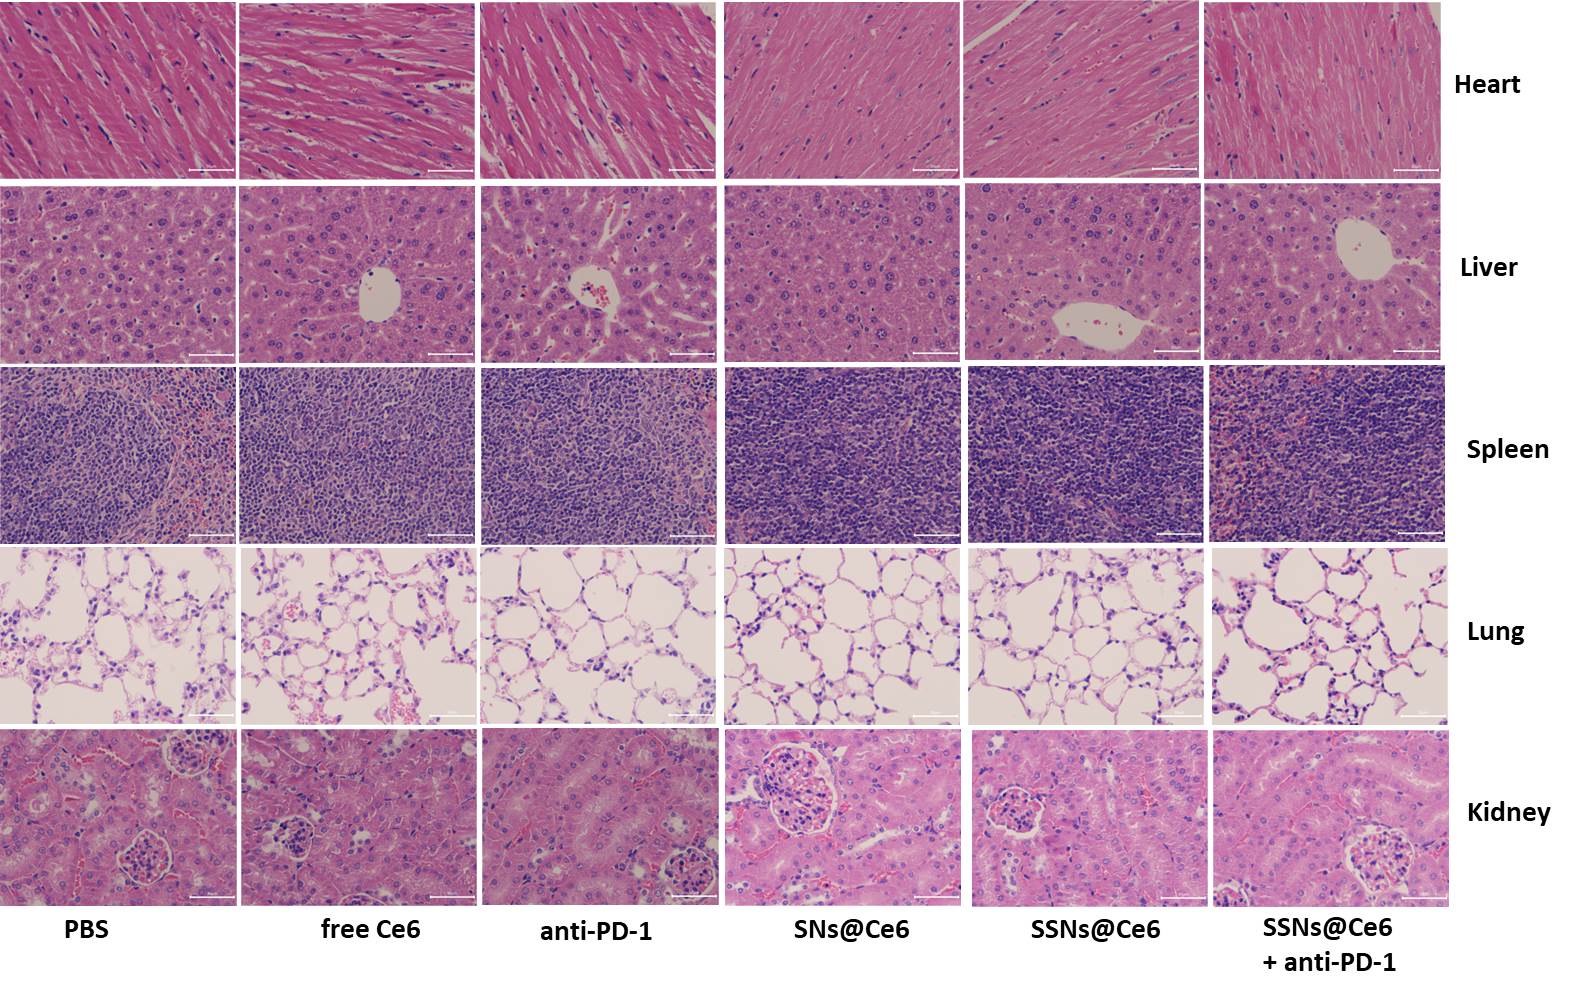


**Figure S7**. H &E staining image of heart, liver, lung, spleen, and kidney from each group. Scale bars are 50 μm.

**Abbreviations:** Ce6, chlorin e6; SNs, inorganic silica nanocarrier; SNs@Ce6, chlorin e6-loading inorganic silica nanocarrier; SSNs@Ce6, chlorin e6-loading disulfide-bond-bridged organosilica nanoparticles.
